# Supplementary material
Source: PubMed Central journal article supplement (PMC6587178)
Supplement: NIHMS1015879-supplement-Supplementary_Table_1.pdf [file NIHMS1015879-supplement-Supplementary_Table_1.pdf]

**Supplementary Table 1. A comparison of patients in the study with previously treated, ineligible patients from MDA**

|                  |          | Patients in this<br>study(n=385) | Previously treated<br>(n=627) | P-value |
|------------------|----------|----------------------------------|-------------------------------|---------|
| Age, mean (SD)   |          | 60.6(13.1)                       | 56.84(13.76)                  | <0.001  |
| Gender, N (%)    | Women    | 254(66.0)                        | 411(65.55)                    | 0.890   |
|                  | Men      | 131(34.0)                        | 216(34.45)                    |         |
|                  | White    | 308(80.0)                        | 456(83.52)                    |         |
| Ethnicity, N (%) | Hispanic | 34(8.8)                          | 43(7.88)                      | 0.511   |
|                  | African  | 40(10.4)                         | 47(8.61)                      |         |
|                  | American |                                  |                               |         |
