# Supplementary material
Source: PubMed Central journal article supplement (PMC6587178)
Supplement: NIHMS1015879-supplement-Supplementary_Table_2.pdf [file NIHMS1015879-supplement-Supplementary_Table_2.pdf]

**Supplementary Table 2. A comparison of subjects with and without DRC, by case-control status**

|                     |                  | Case                    |                             |         | Control                 |                             |         |
|---------------------|------------------|-------------------------|-----------------------------|---------|-------------------------|-----------------------------|---------|
|                     |                  | DRC measured<br>(n=219) | DRC not measured<br>(n=166) | p-value | DRC measured<br>(n=309) | DRC not measured<br>(n=227) | P-value |
| Gender, N (%)       | Men              | 74(33.79)               | 57(34.34)                   | 0.911   | 97(31.39)               | 85(37.44)                   | 0.144   |
|                     | Women            | 145(66.21)              | 109(65.66)                  |         | 212(68.61)              | 142(62.56)                  |         |
| Ethnicity, N (%)    | White            | 173(79.00)              | 135(81.33)                  | 0.552   | 204(66.02)              | 200(88.11)                  | <0.001  |
|                     | Hispanic         | 23(10.50)               | 11(6.63)                    |         | 40(12.94)               | 7(3.08)                     |         |
|                     | African American | 21(9.59)                | 19(11.45)                   |         | 62(20.06)               | 18(7.93)                    |         |
|                     | Others           | 2(0.91)                 | 1(0.60)                     |         | 3(0.97)                 | 2(0.88)                     |         |
| Age, mean (SD)      |                  | 59.06(12.95)            | 62.72(13.12)                | 0.007   | 60.03(11.78)            | 57.74(13.27)                | 0.036   |
| SHS exposure, N (%) |                  | 109(78.42)              | 108(83.72)                  | 0.270   | 149(65.93)              | 149(73.76)                  | 0.079   |
