# Supplementary material
Source: PubMed Central journal article supplement (PMC6587178)
Supplement: NIHMS1015879-supplement-Supplementary_Table_3.pdf [file NIHMS1015879-supplement-Supplementary_Table_3.pdf]

**Supplementary Table 3. Characteristics of the first-degree relatives of probands who had DRC information**

| First-degree relatives of the case-control subjects* |                  | Optimal DRC<br>(n=1676) | Suboptimal DRC<br>(n=2046) | P-value        |                  |         |
|------------------------------------------------------|------------------|-------------------------|----------------------------|----------------|------------------|---------|
| N per subject                                        |                  | 7.91(3.33)              | 7.96(3.82)                 | 0.8686         |                  |         |
| Gender, N (%)                                        | Men              | 863(51.5)               | 1049(51.3)                 | 0.9174         |                  |         |
|                                                      | Women            | 813(48.5)               | 995(48.7)                  |                |                  |         |
| Ethnicity, N (%)                                     | White            | 1068(63.7)              | 1216(59.4)                 | 0.0002         |                  |         |
|                                                      | Hispanic         | 293(17.5)               | 335(16.4)                  |                |                  |         |
|                                                      | African American | 301(18.0)               | 485(23.7)                  |                |                  |         |
|                                                      | Others           | 14(0.8)                 | 10(0.5)                    |                |                  |         |
| Age, mean (SD)                                       |                  | 53.9(20.7)              | 53.6(20.9)                 | 0.6138         |                  |         |
| N (%) smokers                                        |                  | 567(34.3)               | 682(34.0)                  | 0.8437         |                  |         |
| First-degree relatives of the case-control subjects  |                  | Lowest quartile         | Second quartile            | Third quartile | Highest quartile | P-value |
| N per subject                                        |                  | 7.95(3.84)              | 7.97(3.82)                 | 8.25(3.54)     | 7.46(2.99)       | 0.4673  |
| Gender, N (%)                                        | Men              | 505(48.5)               | 544(54.3)                  | 508(51.3)      | 355(51.8)        | 0.0724  |
|                                                      | Women            | 537(51.5)               | 458(45.7)                  | 482(48.7)      | 331(48.3)        |         |
| Ethnicity, N (%)                                     | White            | 607(58.3)               | 609(60.7)                  | 597(60.3)      | 471(68.7)        | <0.0001 |
|                                                      | Hispanic         | 165(15.8)               | 170(16.9)                  | 200(20.2)      | 93(13.6)         |         |
|                                                      | African American | 270(24.9)               | 215(24.4)                  | 189(19.1)      | 112(16.3)        |         |
|                                                      | Others           | 0(0)                    | 10(1.0)                    | 4(0.4)         | 10(1.5)          |         |
| Age, mean (SD)                                       |                  | 53.0(21.0)              | 54.2(20.9)                 | 53.7(20.3)     | 54.2(21.3)       | 0.5284  |
| N (%) smokers                                        |                  | 348(34.0)               | 334(34.1)                  | 349(36.0)      | 218(32.0)        | 0.3975  |

\* Relatives of 212 probands with optimal DRC and 257 probands with suboptimal DRC.
