# Supplementary material
Source: PubMed Central journal article supplement (PMC6587178)
Supplement: NIHMS1015879-supplement-Supplementary_Table_4.pdf [file NIHMS1015879-supplement-Supplementary_Table_4.pdf]

**Supplementary Table 4. DRC of case and control probands as a predictor of lung cancer in first-degree relatives (Whites only)**

|                  |                            | Case              |                       |      |            |         | Control           |                       |             |                  |               |
|------------------|----------------------------|-------------------|-----------------------|------|------------|---------|-------------------|-----------------------|-------------|------------------|---------------|
|                  |                            | Affected<br>N (%) | Not affected<br>N (%) | OR*  | 95% CI*    | P-value | Affected<br>N (%) | Not affected<br>N (%) | OR*         | 95% CI*          | P-value       |
| DRC              | >median                    | 7(22.6)           | 198(32.6)             | 1.0  |            |         | 17(65.4)          | 380(50.7)             | 1.0         |                  |               |
|                  | <median                    | 24(77.4)          | 410(67.4)             | 1.58 | 0.64-3.88  | 0.3228  | 9(34.6)           | 369(49.3)             | 0.53        | 0.21-1.36        | 0.1879        |
| DRC by quartiles |                            |                   |                       |      |            |         |                   |                       |             |                  |               |
|                  | Highest (4 <sup>th</sup> ) | 1(3.2)            | 75(12.4)              | 1.0  |            |         | 2(7.7)            | 193(25.8)             | 1.0         |                  |               |
|                  | 3 <sup>rd</sup>            | 6(19.4)           | 123(20.2)             | 4.66 | 0.53-41.34 | 0.1669  | 15(57.7)          | 187(25.0)             | 1.70        | 0.31-9.31        | 0.5397        |
|                  | 2 <sup>nd</sup>            | 8(25.8)           | 157(25.8)             | 3.30 | 0.34-32.20 | 0.3043  | 5(19.2)           | 175(23.3)             | 2.62        | 0.45-15.1        | 0.2816        |
|                  | Lowest (1 <sup>st</sup> )  | 16(51.6)          | 253(44.6)             | 3.37 | 0.35-32.54 | 0.2941  | 4(15.4)           | <b>194(25.9)</b>      | <b>7.19</b> | <b>1.50-34.5</b> | <b>0.0137</b> |

\*OR, Odds Ratio; CI, Confidence Interval; adjusted for age and gender of the proband and of the relatives, type of relationship to the proband, smoking status and birth cohort of the relative.
